# Supplementary material for: Sub-precessional pacing of ice conditions and organic carbon burial in the Ross Sea, Antarctica, during the mid-Pliocene Warm Period
Source: Research Square preprint supplement (doi:10.21203/rs.3.rs-7511634/v1), 2025-10-27
Supplement: Supplementary file 2 [file dd59b952865aec2f52495b09.xlsx]

## Sheet: Sheet1
Site	Hole	Core	Section	Top Offset (cm)	Bottom Offset (cm)	%N	1 sigma	%C	1 sigma	%Corg	1sigma	C/N	δ13C	1 sigma	Depth CSF-B (m)	Interpretation
U1524	A	23	1	5	7	0.0634707	0.02	0.65905	0.02	0.640667	0.02	10.0939	-25.007	0.1	198.85	Open water
U1524	A	23	2	23	25	0.0416744	0.02	0.225993	0.02	0.248577	0.02	5.96472	-26.5224	0.1	200.391	Perennial ice coverage
U1524	A	23	3	7	9	0.0670685	0.02	0.690638	0.02	0.703031	0.02	10.4823	-24.9793	0.1	201.59	Open water
U1524	A	23	5	7	9	0.0565959	0.02	0.610354	0.02	0.626771	0.02	11.0745	-25.0583	0.1	204.36	Open water
U1524	A	23	7	4	6	0.0563029	0.02	0.574578	0.02	0.593432	0.02	10.54	-25.0595	0.1	207.11	Open water
U1524	A	23	CC	6	8	0.0350929	0.02	0.238511	0.02	0.202356	0.02	5.7663	-27.0081	0.1	208.2	Perennial ice coverage
U1524	A	24	1	7	9	0.0373618	0.02	0.16827	0.02	0.151476	0.02	4.0543	-27.6635	0.1	208.37	Perennial ice coverage
U1524	A	24	2	3	5	0.060241	0.02	0.612958	0.02	0.587236	0.02	9.74811	-25.0408	0.1	209.73	Open water
U1524	A	24	3	7	9	0.0354803	0.02	0.19126	0.02	0.211597	0.02	5.96378	-27.1953	0.1	211.15	Perennial ice coverage
U1524	A	24	4	7	9	0.0618199	0.02	0.671984	0.02	0.615689	0.02	9.9594	-25.06	0.1	212.486	Open water
U1524	A	24	4	118	120	0.0360908	0.02	0.266936	0.02	0.264876	0.02	7.33916	-26.3984	0.1	213.596	Perennial ice coverage
U1524	A	24	5	7	9	0.0584102	0.02	0.726242	0.02	0.64824	0.02	11.098	-24.9033	0.1	213.851	Open water
U1524	A	24	7	3	5	0.0579418	0.02	0.662464	0.02	0.585309	0.02	10.1017	-25.1414	0.1	216.65	Open water
U1524	A	25	1	66	68	0.0431088	0.02	0.326281	0.02	0.300375	0.02	6.96784	-27.4898	0.1	218.46	Perennial ice coverage
U1524	A	25	1	80	82	0.0658548	0.02	0.653522	0.02	0.605921	0.02	9.20085	-24.8844	0.1	218.6	Open water
U1524	A	25	2	8	10	0.0446891	0.02	0.246257	0.02	0.228607	0.02	5.11549	-26.9362	0.1	219.22	Perennial ice coverage
U1524	A	25	3	5	7	0.0574062	0.02	0.61938	0.02	0.65279	0.02	11.3714	-24.8279	0.1	220.57	Open water
U1524	A	25	3	40	42	0.0418245	0.02	0.244844	0.02	0.222653	0.02	5.32351	-27.1604	0.1	220.896	Perennial ice coverage
U1524	A	25	5	5	7	0.059713	0.02	0.642818	0.02	0.645058	0.02	10.8026	-24.5942	0.1	223.317	Open water
U1524	A	25	6	47	49	0.0398418	0.02	0.244621	0.02	0.220182	0.02	5.5264	-27.6837	0.1	225.122	Perennial ice coverage
U1524	A	25	7	3	5	0.068753	0.02	0.751695	0.02	0.681968	0.02	9.91909	-24.8227	0.1	226.058	Open water
U1524	A	25	7	22	24	0.0410812	0.02	0.253721	0.02	0.285399	0.02	6.94721	-25.9968	0.1	226.248	Perennial ice coverage
U1524	A	26	1	7	9	0.0641849	0.02	0.652286	0.02	0.624897	0.02	9.73588	-24.9834	0.1	227.37	Open water
U1524	A	26	2	98	100	0.0379859	0.02	0.229253	0.02	0.251597	0.02	6.62343	-27.475	0.1	229.644	Perennial ice coverage
U1524	A	26	3	7	9	0.0673421	0.02	0.687436	0.02	0.657153	0.02	9.75843	-24.9867	0.1	230.166	Open water
U1524	A	26	4	128	130	0.0381969	0.02	0.205685	0.02	0.188524	0.02	4.9356	-27.8665	0.1	232.808	Perennial ice coverage
U1524	A	26	5	7	9	0.0642343	0.02	0.661244	0.02	0.685284	0.02	10.6685	-24.9673	0.1	233.02	Open water
U1524	A	26	5	13	15	0.0428821	0.02	0.331749	0.02	0.310268	0.02	7.23536	-26.213	0.1	233.08	Perennial ice coverage
U1524	A	26	6	7	9	0.06	0.02	0.76	0.02	0.652382	0.02	10.873	-25.0571	0.1	234.461	Open water
U1524	A	26	6	47	49	0.041335	0.02	0.224954	0.02	0.20544	0.02	4.97012	-28.2781	0.1	234.761	Perennial ice coverage
U1524	A	26	7	7	9	0.0641174	0.02	0.624007	0.02	0.672704	0.02	10.4918	-25.2081	0.1	235.902	Open water
U1524	A	27	1	7	9	0.06	0.02	0.68	0.02	0.586627	0.02	9.77712	-25.0337	0.1	236.87	Open water
U1524	A	27	3	6	8	0.0462519	0.02	0.484965	0.02	0.168578	0.02	3.64477	-27.3368	0.1	239.509	Perennial ice coverage
U1524	A	27	5	7	9	0.0635216	0.02	0.686545	0.02	0.625589	0.02	9.84844	-25.1619	0.1	242.33	Open water
U1524	A	27	5	41	43	0.0413414	0.02	0.257462	0.02	0.279448	0.02	6.75951	-26.542	0.1	242.67	Perennial ice coverage
U1524	A	27	7	7	9	0.0623318	0.02	0.648666	0.02	0.651974	0.02	10.4597	-24.9642	0.1	245.027	Open water
U1524	A	28	1	7	9	0.0593863	0.02	0.654368	0.02	0.659326	0.02	11.1023	-25.0194	0.1	246.37	Open water
U1524	A	28	1	81	83	0.0402204	0.02	0.21453	0.02	0.18682	0.02	4.64492	-27.1693	0.1	247.11	Perennial ice coverage
U1524	A	28	2	7	9	0.0638878	0.02	0.641308	0.02	0.587014	0.02	9.1882	-24.9743	0.1	247.698	Open water
U1524	A	28	2	137	139	0.0415153	0.02	0.23982	0.02	0.224895	0.02	5.41716	-26.7657	0.1	248.998	Perennial ice coverage
U1524	A	28	3	4	6	0.0514701	0.02	0.551334	0.02	0.566489	0.02	11.0062	-24.9946	0.1	249.014	Open water
U1524	A	28	3	93	95	0.0387213	0.02	0.258469	0.02	0.233381	0.02	6.02721	-26.9206	0.1	249.904	Perennial ice coverage
U1524	A	28	5	7	9	0.059107	0.02	0.631794	0.02	0.672622	0.02	11.3798	-24.9921	0.1	251.728	Open water
U1524	A	28	7	13	15	0.0533313	0.02	0.590824	0.02	0.602767	0.02	11.3023	-25.0641	0.1	254.481	Open water
U1524	A	28	7	123	125	0.0475597	0.02	0.43051	0.02	0.428391	0.02	9.00744	-25.6812	0.1	255.581	Perennial ice coverage
U1524	A	29	1	7	9	0.0643884	0.02	0.689866	0.02	0.65118	0.02	10.1133	-25.1335	0.1	255.87	Open water
U1524	A	29	3	7	9	0.0621572	0.02	0.664073	0.02	0.617393	0.02	9.93276	-25.2776	0.1	258.533	Open water
U1524	A	29	5	5	7	0.0613239	0.02	0.633523	0.02	0.608356	0.02	9.92039	-25.2447	0.1	261.186	Open water
U1524	A	29	5	98	100	0.0395236	0.02	0.224535	0.02	0.212805	0.02	5.38426	-27.8193	0.1	262.116	Perennial ice coverage
U1524	A	29	7	8	10	0.0629305	0.02	0.635357	0.02	0.592369	0.02	9.41308	-25.1382	0.1	263.87	Open water
U1524	A	30	1	7	9	0.0619705	0.02	0.652629	0.02	0.621288	0.02	10.0255	-25.2727	0.1	265.37	Open water
U1524	A	30	3	5	7	0.0599714	0.02	0.642086	0.02	0.61116	0.02	10.1909	-25.4414	0.1	267.85	Open water
U1524	A	30	CC	7	9	0.037609	0.02	0.180299	0.02	0.161739	0.02	4.30055	-27.6545	0.1	269.952	Perennial ice coverage
U1524	A	32	1	4	6	0.0654373	0.02	0.661779	0.02	0.679134	0.02	10.3784	-24.9445	0.1	270.74	Open water
U1524	A	32	2	147	149	0.0370993	0.02	0.241222	0.02	0.27441	0.02	7.39663	-26.7765	0.1	272.74	Perennial ice coverage
U1524	A	32	CC	5	7	0.0521185	0.02	0.532182	0.02	0.528024	0.02	10.1312	-24.8535	0.1	272.83	Open water
U1524	A	33	1	58	60	0.0405064	0.02	0.257733	0.02	0.233986	0.02	5.77651	-27.2576	0.1	280.35	Perennial ice coverage
U1524	A	33	2	5	7	0.0614349	0.02	0.661505	0.02	0.619964	0.02	10.0914	-25.1507	0.1	281.44	Open water
U1524	A	34	CC	5	7	0.02592	0.02	0.106764	0.02	0.097637	0.02	3.76686	-28.052	0.1	289.95	Perennial ice coverage
